# Supplementary material for: Utility of posaconazole therapeutic drug monitoring and assessment of plasma concentration threshold for effective prophylaxis of invasive fungal infections: a meta-analysis with trial sequential analysis
Source: Springer Nature journal article supplement (doi:10.1186/s12879-018-3055-3), 2018-04-02
Supplement: MOESM1 [file 15582858]

**Table SI.** Summary of sensitive analysis for prophylaxis efficacy

| Term excluded                                                                           | Studies excluded                                                                                       | Cut-off value(mg/L) | OR(95% CI)-primary random effect model | OR(95% CI)-after removing random effect model | P- primary | P- after removing |
|-----------------------------------------------------------------------------------------|--------------------------------------------------------------------------------------------------------|---------------------|----------------------------------------|-----------------------------------------------|------------|-------------------|
| NOS $\leq$ 6                                                                            | Park 2016<br>Hummert 2015<br>Cattaneo 2013<br>Pavan 2012                                               | Css $\geq$ 0.5      | 1.98 [1.09, 3.58]                      | 2.09 [1.09, 4.01]                             | 0.02       | 0.03              |
|                                                                                         | Tverdek 2017<br>Hummert 2015                                                                           | Css $\geq$ 0.7      | 1.84 [0.94, 3.63]                      | 2.04 [1.01, 4.09]                             | 0.08       | 0.05              |
| Intervention following TDM result (intervention excluded)                               | Thakuria 2016<br>Park 2016<br>Hummert 2015<br>Pavan 2012<br>Shields 2011<br>Bryant 2011<br>Welzen 2011 | Css $\geq$ 0.5      | 1.98 [1.09, 3.58]                      | 2.23 [1.13, 4.42]                             | 0.02       | 0.02              |
|                                                                                         | Liebenstein 2017<br>Tverdek 2017<br>Hummert 2015<br>Shields 2011<br>Bryant 2011<br>Welzen 2011         | Css $\geq$ 0.7      | 1.84 [0.94, 3.63]                      | 2.35 [1.10, 4.99]                             | 0.08       | 0.03              |
| small sample size (n<30 excluded)                                                       | Thakuria 2016<br>Hummert 2015<br>Bryant 2011<br>Fanci 2011<br>Welzen 2011<br>Shields 2011              | Css $\geq$ 0.5      | 1.98 [1.09, 3.58]                      | 2.04 [1.09, 3.82]                             | 0.02       | 0.03              |
|                                                                                         | Vanstraelen 2016<br>Hummert 2015<br>Tonini 2013<br>Bryant 2011<br>Welzen 2011<br>Shields 2011          | Css $\geq$ 0.7      | 1.84 [0.94, 3.63]                      | 1.69 [0.77, 3.71]                             | 0.08       | 0.19              |
| IFI diagnosed following EORCT/MSG criteria (studies without specific criteria excluded) | Hummert 2015<br>Fanci 2015<br>Welzen 2011                                                              | Css $\geq$ 0.5      | 1.98 [1.09, 3.58]                      | 1.98 [1.09, 3.58]                             | 0.02       | 0.02              |
|                                                                                         | Vanstraelen 2016<br>Hummert 2015<br>Welzen 2011                                                        | Css $\geq$ 0.7      | 1.84 [0.94, 3.63]                      | 1.84 [0.94, 3.63]                             | 0.08       | 0.08              |

|              | Random sequence generation (selection bias) | Allocation concealment (selection bias) | Blinding of participants and personnel (performance bias) | Blinding of outcome assessment (detection bias) | Incomplete outcome data (attrition bias) | Selective reporting (reporting bias) | Other bias |
|--------------|---------------------------------------------|-----------------------------------------|-----------------------------------------------------------|-------------------------------------------------|------------------------------------------|--------------------------------------|------------|
| Cornely 2007 | ?                                           | ?                                       | +                                                         | +                                               | +                                        | +                                    | +          |
| Ullmann 2007 | ?                                           | ?                                       | +                                                         | +                                               | +                                        | +                                    | +          |

**Figure S1.** Source of bias in two randomized trials following Cochrane Collaboration’s tool.

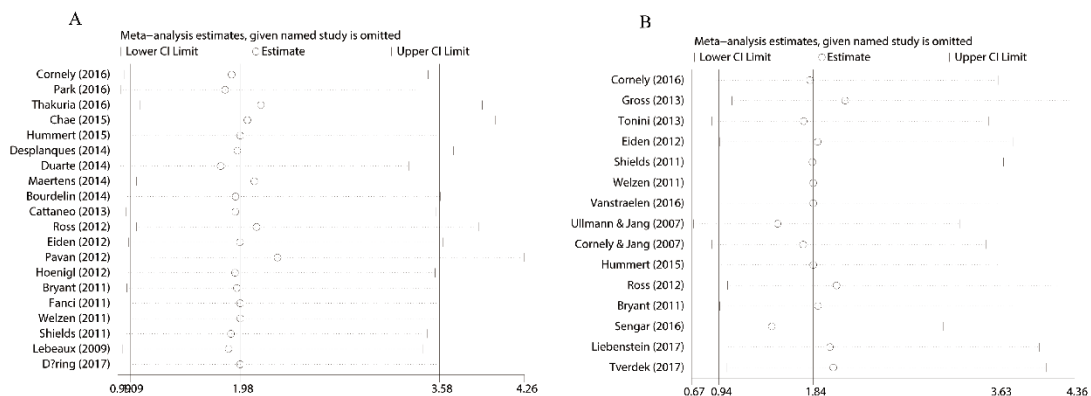

**Figure S2.** Sensitive analysis of individual study involved at cut-off value of 0.5 mg/L (A) and 0.7 mg/L (B).

## Statement for detailed searching strategy

Two database, PubMed and EMBASE were searched before September 1, 2017. The search from PubMed and EMBASE were all limited to human studies.

PubMed (Search date: September 1, 2017)

```
(((((("Drug Monitoring"[Mesh]) OR "Pharmacovigilance"[Mesh]) OR ( "Drug-Related Side Effects and Adverse Reactions"[Mesh] OR "Adverse Drug Reaction Reporting Systems"[Mesh] OR "Drug Eruptions"[Mesh] ))) OR (((concentration) OR exposure) OR efficacy) OR response)) AND (((posaconazole) OR Noxafil) AND Humans[Mesh]))
```

Search result: 528

EMBASE (Search date: September 1, 2017)

#1 posaconazole OR noxafil AND [humans]/lim (5638)

#2 concentration OR exposure OR efficacy OR response (6,315,359)

#3 'drug monitoring'/exp OR 'drug surveillance program'/exp OR 'adverse drug reaction'/exp OR 'drug fatality'/exp (539,892)

#4 #2 OR #3 (6,612,498)

#5 #1 AND #4 (3390)

Search result: 3390
